# Supplementary material
Source: publisher figshare collection journal article supplement (https://sage.figshare.com/ndownloader/files/15460220)
Supplement: Supplementary file 1 [file 15460220]

## List of interviewees:

### Interviews cited

March 2013: Interview, Challenge Fund, ESF Coordinator, Glasgow.  
March 2013: Interview, CPP representative, Glasgow.  
March 2013: Interview, Challenge Fund project partner, Lowlands & Uplands Area, university sector.  
March 2013: Scottish Government Official, Glasgow.  
August 2013: Representative, Challenge Fund project partner, Lowlands & Uplands Area, private sector.  
November 2013: Representative, Strategic Delivery Body project partner, Highlands and Islands Area, social enterprise sector.

Official, Scottish Enterprise, Strategic Delivery Body, Lowlands and Uplands Area.  
Representative Scottish Council for Voluntary Organisations (SCVO), Challenge Fund.  
Representative Scottish Trades Union Conference, Challenge Fund.  
Official, North Lanarkshire Council, Community Planning Partnership, Lowlands and Uplands Area.  
Official, Inverclyde Council, Community Planning Partnership, Lowlands and Uplands Area.  
Official, Aberdeenshire Council, Community Planning Partnership, Lowlands and Uplands Area.  
Official, East Ayrshire Council, Community Planning Partnership, Lowlands and Uplands Area.  
Official, Fife Council, Community Planning Partnership, Lowlands and Uplands Area.  
Official, Dundee Council, Community Planning Partnership, Lowlands and Uplands Area.  
Official, University of the Highlands, Strategic Delivery Body, Highlands and Islands Area.  
Official, Clackmannanshire Council, Community Planning Partnership, Lowlands and Uplands Area.  
Official, Highlands and Islands Enterprise, Strategic Delivery Body, Highlands and Islands Area.  
Official, South Lanarkshire Council, Community Planning Partnership, Lowlands and Uplands Area.  
Official, Stirling Council, Community Planning Partnership, Lowlands and Uplands Area.  
Official, West Lothian Council, Community Planning Partnership, Lowlands and Uplands Area.  
Official, West Dunbartonshire Council, Community Planning Partnership, Lowlands and Uplands Area.

Official, Higher Education Council, Challenge Fund.

Official, Edinburgh Council Community Planning Partnership, Lowlands and Uplands Area.

Official, Glasgow Council Community Planning Partnership, Lowlands and Uplands Area.

Official, Skills Development Scotland, Challenge Fund.

Senior Official, Scottish Government, European Funding, ERDF.

Senior Official, Scottish Government, European Funding, ESF.

Senior Official, Scottish Government, European Funding, Highlands and Islands Area.

Senior Official, Scottish Government, Lowlands & Uplands Area.

Representative, Strategic Delivery Body project partner, public sector, Lowlands and Uplands Area.

Representative, Challenge Fund project partner Highlands and Islands Area, university sector.

Representative, Challenge Fund project partner, H&I Highlands and Islands Area, public sector.

Representative Challenge Fund project partner, H&I Highlands and Islands Area.

Representative, Challenge Fund project partner, Lowlands & Uplands Area, university sector.

Representative, Challenge Fund project partner, Lowlands & Uplands Area, private sector.

Representative, Strategic Delivery Body project partner, H&I Highlands and Islands Area, social enterprise sector.

A) ESF Network with organisations with the highest degree centrality

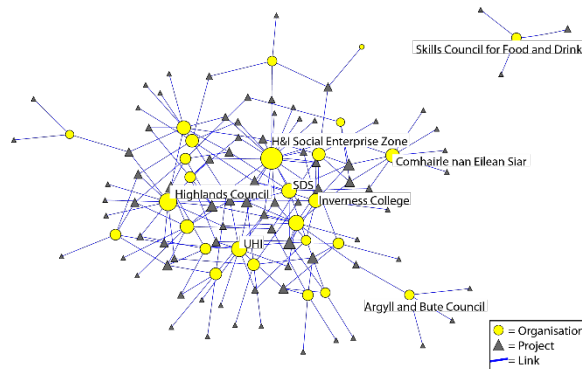

B) ERDF Network with organisations with the highest degree centrality

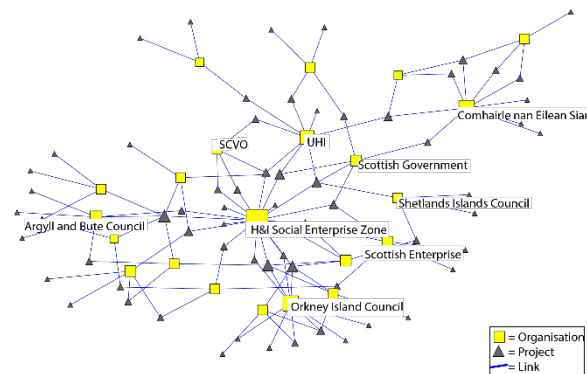

A) ESF Network with organisations with the highest degree centrality.

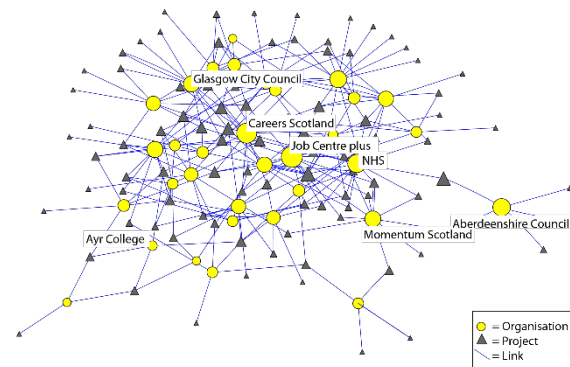

B) ERDF Network with organisations with the highest degree centrality.

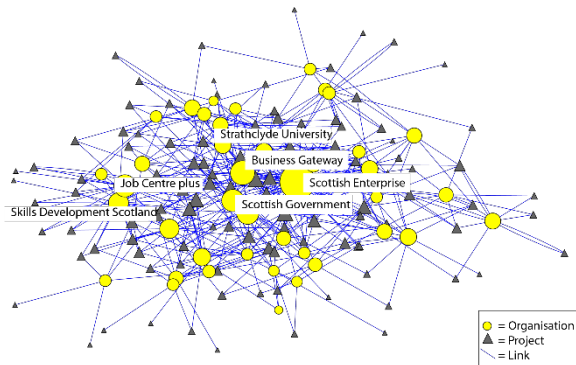

Table 2: correlations between variables

Correlations between network independent variables

|    | 1.    | 2.   | 3.   | 4.   | 5.   | 6.   | 7. |
|----|-------|------|------|------|------|------|----|
| 1. | 1     |      |      |      |      |      |    |
| 2. | -0.11 | 1    |      |      |      |      |    |
| 3. | 0.01  | 0.35 | 1    |      |      |      |    |
| 4. | 0.32  | 0.00 | 0.36 | 1    |      |      |    |
| 5. | 0.04  | 0.07 | 0.24 | 0.07 | 1    |      |    |
| 6. | 0.10  | 0.45 | 0.31 | 0.43 | 0.06 | 1    |    |
| 7. | 0.02  | 0.29 | 0.62 | 0.20 | 0.08 | 0.24 | 1  |
